# Supplementary material for: Quantification of Fluid Volume and Distribution in the Paediatric Colon via Magnetic Resonance Imaging
Source: MDPI journal article supplement (doi:10.3390/pharmaceutics13101729), 2021-10-19
Supplement: s1 [file s1]

# Supplementary Materials: Quantification of Fluid Volume and Distribution in the Paediatric Colon via Magnetic Resonance Imaging

Jan Goelen , Benoni Alexander , Haren Eranga Wijesinghe , Emily Evans , Gopal Pawar , Richard D. Horniblow and Hannah K. Batchelor

**Table S1.** Data on participants demographics and MRI set-up.

| ID | Age      | Age (years) | Age group  | Weight (kg) | Sex (Male (M) or Female (F)) | Fed state | Hospital | Echo Time TE (ms) | Repetition time TR (ms) | Z-axis (cm) |
|----|----------|-------------|------------|-------------|------------------------------|-----------|----------|-------------------|-------------------------|-------------|
| 2  | 2 w      | 0.04        | newborn    | N/A         | F                            | fasted    | BCH      | 241               | 2660.65                 | 0.09        |
| 3  | 5 m      | 0.42        | newborn    | 6.8         | F                            | fasted    | BCH      | 87                | 3200                    | 0.55        |
| 4  | 5 m      | 0.42        | newborn    | 7.1         | F                            | fasted    | BCH      | 241               | 4008.18                 | 0.09        |
| 5  | 8 m      | 0.67        | newborn    | 8.8         | F                            | fasted    | BCH      | 117               | 1400                    | 0.16        |
| 6  | 12 m     | 1.00        | newborn    | 9.7         | F                            | fasted    | BCH      | 241               | 3012.22                 | 0.09        |
| 7  | 1 w      | 0.02        | newborn    | 2.88        | F                            | fasted    | BCH      | 241               | 3012.22                 | 0.09        |
| 8  | 1 y 10 m | 1.83        | newborn    | 11          | M                            | fasted    | BCH      | 221               | 2943.23                 | 0.09        |
| 9  | 18 m     | 1.50        | newborn    | 11          | F                            | fasted    | BCH      | 241               | 2844.65                 | 0.09        |
| 10 | 12 m     | 1.00        | newborn    | 7.2         | M                            | fasted    | BCH      | 704               | 4356.24                 | 0.09        |
| 12 | 2 y 2 m  | 2.17        | pre-school | 10          | F                            | fasted    | BCH      | 240               | 2960.74                 | 0.09        |
| 13 | 3 y 2 m  | 3.17        | pre-school | 16.3        | F                            | fasted    | BCH      | 241               | 3021.27                 | 0.09        |
| 14 | 2 y 1 m  | 2.08        | pre-school | 12.2        | F                            | fasted    | BCH      | 241               | 3010.72                 | 0.09        |
| 15 | 3 y 7 m  | 3.58        | pre-school | 12          | M                            | fasted    | BCH      | 241               | 2907.49                 | 0.09        |
| 16 | 6 y 8 m  | 6.67        | school-age | 22.1        | F                            | fasted    | BCH      | 241               | 3161.32                 | 0.09        |
| 18 | 5 y      | 5.00        | pre-school | 12.8        | M                            | fasted    | BCH      | 87                | 2200                    | 0.55        |
| 19 | 4 y 5 m  | 4.42        | pre-school | 16.9        | F                            | fasted    | BCH      | 241               | 3011.71                 | 0.09        |
| 20 | 6 y 2 m  | 6.17        | school-age | N/A         | F                            | fasted    | BCH      | 241               | 2747.37                 | 0.09        |

|    |         |           |             |      |     |        |      |       |         |        |
|----|---------|-----------|-------------|------|-----|--------|------|-------|---------|--------|
| 21 | 8 y 3 m | 8.2<br>5  | school-age  | 15.9 | M   | fasted | BCH  | 241   | 2900.01 | 0.09   |
| 22 | 9 y 1 m | 9.0<br>8  | school-age  | 39.1 | F   | fasted | BCH  | 87    | 3200    | 0.55   |
| 23 | 8 y 2 m | 8.1<br>7  | school-age  | 35.3 | M   | fasted | BCH  | 241   | 3022.19 | 0.09   |
| 24 | 9 y 8 m | 9.6<br>7  | school-age  | 28.7 | F   | fasted | BCH  | 241   | 3466.53 | 0.09   |
| 25 | 15 y    | 15.<br>00 | adolescents | N/A  | M   | fasted | BCH  | 242   | 3987.78 | 0.09   |
| 30 | 12      | 12.<br>00 | adolescents | 33.5 | F   | fed    | UHCW | 1.8   | 4.822   | 0.6995 |
| 31 | 13      | 13.<br>00 | adolescents | 52.7 | M   | fed    | UHCW | 1.896 | 5.695   | 0.498  |
| 32 | 12      | 12.<br>00 | adolescents | 33.5 | F   | fed    | UHCW | 1.8   | 4.822   | 0.6995 |
| 34 | 15      | 15.<br>00 | adolescents | 55   | F   | fed    | UHCW | 1.896 | 5.661   | 0.4997 |
| 35 | 16      | 16.<br>00 | adolescents | 59   | F   | fed    | UHCW | 1.896 | 5.844   | 0.498  |
| 36 | 15      | 15.<br>00 | adolescents | 65   | F   | fed    | UHCW | 1.896 | 5.604   | 0.5    |
| 37 | 15      | 15.<br>00 | adolescents | 94   | F   | fed    | UHCW | 1.896 | 5.604   | 0.5    |
| 38 | 10      | 10.<br>00 | school-age  | 32.6 | F   | fed    | UHCW | 2.1   | 652.77  | 0.2998 |
| 39 | 11      | 11.<br>00 | school-age  | 28   | M   | fed    | UHCW | 2.1   | 652.77  | 0.3    |
| 40 | 13      | 13.<br>00 | adolescents | 65   | F   | fed    | UHCW | 2.13  | 623.86  | 0.5    |
| 41 | 14      | 14.<br>00 | adolescents | 54   | F   | fed    | UHCW | 1.72  | 4.253   | 0.7    |
| 42 | 15      | 15.<br>00 | adolescents | 58   | F   | fed    | UHCW | 1.896 | 5.604   | 0.5    |
| 43 | 16      | 16.<br>00 | adolescents | 54.4 | M   | fed    | UHCW | 1.9   | 5.716   | 0.4994 |
| 44 | 16      | 16.<br>00 | adolescents | 65   | F   | fed    | UHCW | 1.9   | 5.764   | 0.4982 |
| 45 | 16      | 16.<br>00 | adolescents | 60   | F   | fed    | UHCW | 1.896 | 5.604   | 0.5    |
| 46 | 16      | 16.<br>00 | adolescents | 57   | M   | fed    | UHCW | 2.02  | 4.598   | 0.5988 |
| 47 | 16      | 16.<br>00 | adolescents | 56   | M   | fed    | UHCW | 1.724 | 4.635   | 0.628  |
| 48 | 16      | 16.<br>00 | adolescents | 102  | M   | fed    | UHCW | 1.888 | 5.519   | 0.4983 |
| 49 | 3       | 3.0<br>0  | pre-school  | N/A  | N/A | fasted | BCH  | 241   | 3012.72 | 0.09   |
| 50 | 3       | 3.0<br>0  | pre-school  | N/A  | N/A | fasted | BCH  | 241   | 2903    | 0.09   |

|    |   |          |            |     |     |        |     |     |         |      |
|----|---|----------|------------|-----|-----|--------|-----|-----|---------|------|
| 51 | 3 | 3.0<br>0 | pre-school | N/A | N/A | fasted | BCH | 221 | 3011.76 | 0.09 |
| 52 | 3 | 3.0<br>0 | pre-school | N/A | N/A | fasted | BCH | 241 | 3012.22 | 0.09 |
| 53 | 5 | 5.0<br>0 | pre-school | N/A | N/A | fasted | BCH | 241 | 4016.56 | 0.09 |
| 54 | 5 | 5.0<br>0 | pre-school | N/A | N/A | fasted | BCH | 241 | 3168.3  | 0.09 |

**Table S2.** Data on used threshold values, fluid volumes via both protocols and number of pockets in the total and segments of the colon per participant.

| ID | Total co-<br>lonic fluid<br>volume via<br>2D proto-<br>col (mL) | Total co-<br>lonic fluid<br>volume via<br>3D protocol<br>(mL) | Total<br>Number<br>of fluid<br>pockets | Number<br>of fluid<br>pockets<br>in as-<br>cending<br>colon | Number<br>of fluid<br>pockets<br>in trans-<br>verse co-<br>lon | Number<br>of fluid<br>pockets in<br>descend-<br>ing colon | Threshold<br>value | Fluid vol-<br>ume in as-<br>cending co-<br>lon via 2D<br>protocol<br>(mL) | Fluid vol-<br>ume in<br>transverse<br>colon via<br>2D proto-<br>col (mL) | Fluid vol-<br>ume in de-<br>scending<br>colon via<br>2D proto-<br>col (mL) |
|----|-----------------------------------------------------------------|---------------------------------------------------------------|----------------------------------------|-------------------------------------------------------------|----------------------------------------------------------------|-----------------------------------------------------------|--------------------|---------------------------------------------------------------------------|--------------------------------------------------------------------------|----------------------------------------------------------------------------|
| 2  | 0                                                               | 0                                                             | 0                                      | 0                                                           | 0                                                              | 0                                                         | 292.94             | 0                                                                         | 0                                                                        | 0                                                                          |
| 3  | 67.998                                                          | 69.0434                                                       | 16                                     | 16                                                          | 0                                                              | 0                                                         | 474.7              | 41.603                                                                    | 6.055                                                                    | 20.34                                                                      |
| 4  | 0.0046                                                          | N/A                                                           | N/A                                    | N/A                                                         | N/A                                                            | N/A                                                       | 334                | 0.0046                                                                    | 0                                                                        | 0                                                                          |
| 5  | 0.6755                                                          | 0.817                                                         | 19                                     | 19                                                          | 0                                                              | 0                                                         | 450.91             | 0.6755                                                                    | 0                                                                        | 0                                                                          |
| 6  | 0.9164                                                          | 1.0537                                                        | 21                                     | 17                                                          | 4                                                              | 0                                                         | 320.56             | 0.3458                                                                    | 0.1744                                                                   | 0.3962                                                                     |
| 7  | 0                                                               | 0                                                             | 0                                      | 0                                                           | 0                                                              | 0                                                         | 248.97             | 0                                                                         | 0                                                                        | 0                                                                          |
| 8  | 0.2306                                                          | 0.2962                                                        | 19                                     | 19                                                          | 0                                                              | 0                                                         | 316.78             | 0.2306                                                                    | 0                                                                        | 0                                                                          |
| 9  | 19.092                                                          | N/A                                                           | N/A                                    | N/A                                                         | N/A                                                            | N/A                                                       | 259.36             | 5.1182                                                                    | 13.964                                                                   | 0.0093                                                                     |
| 10 | 0                                                               | 0                                                             | 0                                      | 0                                                           | 0                                                              | 0                                                         | 336.07             | 0                                                                         | 0                                                                        | 0                                                                          |
| 12 | 0.3219                                                          | 0.3474                                                        | 11                                     | 10                                                          | 1                                                              | 0                                                         | 339.9              | 0.2905                                                                    | 0.0058                                                                   | 0.0257                                                                     |
| 13 | 0                                                               | 0                                                             | 0                                      | 0                                                           | 0                                                              | 0                                                         | 302.92             | 0                                                                         | 0                                                                        | 0                                                                          |
| 14 | 0                                                               | 0                                                             | 0                                      | 0                                                           | 0                                                              | 0                                                         | 396.7              | 0                                                                         | 0                                                                        | 0                                                                          |
| 15 | 0.0929                                                          | 0.1196                                                        | 5                                      | 5                                                           | 0                                                              | 0                                                         | 253.81             | 0.0923                                                                    | 0.0005                                                                   | 0                                                                          |
| 16 | 19.835                                                          | 19.8487                                                       | 47                                     | 46                                                          | 0                                                              | 1                                                         | 217.96             | 19.719                                                                    | 0                                                                        | 0.1161                                                                     |
| 18 | 131.49                                                          | 249.602                                                       | 1                                      | 1                                                           | 1                                                              | 1                                                         | 262.35             | 81.123                                                                    | 12.423                                                                   | 37.943                                                                     |
| 19 | 2.6663                                                          | 2.5484                                                        | 35                                     | 31                                                          | 4                                                              | 0                                                         | 186.71             | 2.5183                                                                    | 0.0281                                                                   | 0.12                                                                       |
| 20 | 22.226                                                          | N/A                                                           | N/A                                    | N/A                                                         | N/A                                                            | N/A                                                       | 167.42             | 19.704                                                                    | 0.6523                                                                   | 1.8694                                                                     |
| 21 | 0.3236                                                          | 0.3515                                                        | 32                                     | 32                                                          | 0                                                              | 0                                                         | 355.95             | 0.1415                                                                    | 0.1822                                                                   | 0                                                                          |
| 22 | 0.4065                                                          | 0.498                                                         | 8                                      | 8                                                           | 0                                                              | 0                                                         | 416.81             | 0                                                                         | 0.3966                                                                   | 0.0099                                                                     |
| 23 | 14.164                                                          | 14.1689                                                       | 34                                     | 34                                                          | 0                                                              | 0                                                         | 142.79             | 12.436                                                                    | 1.4667                                                                   | 0.2614                                                                     |
| 24 | 62.872                                                          | 44.942                                                        | 19                                     | 13                                                          | 6                                                              | 0                                                         | 296.71             | 61.925                                                                    | 0.9086                                                                   | 0.0392                                                                     |
| 25 | 0.0037                                                          | 0.004                                                         | 1                                      | 1                                                           | 0                                                              | 0                                                         | 335.03             | 0                                                                         | 0.0037                                                                   | 0                                                                          |
| 30 | 14.238                                                          | 14.2883                                                       | 23                                     | 20                                                          | 3                                                              | 0                                                         | 1526               | 10.153                                                                    | 4.0535                                                                   | 0.0322                                                                     |
| 31 | 167.47                                                          | N/A                                                           | N/A                                    | N/A                                                         | N/A                                                            | N/A                                                       | 1092.5             | 102.3                                                                     | 51.767                                                                   | 13.399                                                                     |
| 32 | 6.1234                                                          | N/A                                                           | N/A                                    | N/A                                                         | N/A                                                            | N/A                                                       | 1717.3             | 5.5002                                                                    | 0.6233                                                                   | 0                                                                          |
| 34 | 152.94                                                          | 139.55                                                        | 19                                     | 19                                                          | 0                                                              | 0                                                         | 1808               | 75.205                                                                    | 56.867                                                                   | 20.868                                                                     |
| 35 | 60.011                                                          | 65.7035                                                       | 65                                     | 53                                                          | 12                                                             | 0                                                         | 1425.6             | 42.458                                                                    | 14.839                                                                   | 2.7141                                                                     |
| 36 | 11.22                                                           | 13.0425                                                       | 26                                     | 26                                                          | 0                                                              | 0                                                         | 1672.1             | 11.22                                                                     | 0                                                                        | 0                                                                          |
| 37 | 0                                                               | 0                                                             | 0                                      | 0                                                           | 0                                                              | 0                                                         | 1526.7             | 0                                                                         | 0                                                                        | 0                                                                          |
| 38 | 92.208                                                          | 86.2179                                                       | 35                                     | 32                                                          | 3                                                              | 0                                                         | 336.85             | 84.962                                                                    | 7.2465                                                                   | 0                                                                          |
| 39 | 0.0873                                                          | 0.0842                                                        | 2                                      | 2                                                           | 0                                                              | 0                                                         | 227.13             | 0                                                                         | 0                                                                        | 0.0873                                                                     |

|    |        |         |     |     |     |     |        |        |        |        |
|----|--------|---------|-----|-----|-----|-----|--------|--------|--------|--------|
| 40 | 0.026  | 0.0257  | 8   | 8   | 0   | 0   | 229.6  | 0      | 0      | 0.026  |
| 41 | 2.0748 | 2.211   | 5   | 5   | 0   | 0   | 1462.8 | 2.0748 | 0      | 0      |
| 42 | 0      | 0       | 0   | 0   | 0   | 0   | 1592   | 0      | 0      | 0      |
| 43 | 0.5303 | 0       | 0   | 0   | 0   | 0   | 1793.1 | 0.5303 | 0      | 0      |
| 44 | 43.198 | 43.2104 | 13  | 13  | 0   | 0   | 1165.4 | 43.185 | 0.0055 | 0.007  |
| 45 | 0      | 0       | 0   | 0   | 0   | 0   | 2136.1 | 0      | 0      | 0      |
| 46 | 0      | 0       | 0   | 0   | 0   | 0   | 939.84 | 0      | 0      | 0      |
| 47 | 6.1601 | 7.6259  | 1   | 1   | 0   | 0   | 1360.7 | 6.1601 | 0      | 0      |
| 48 | 0.5775 | 0.1449  | 7   | 7   | 0   | 0   | 1775   | 0.5775 | 0      | 0      |
| 49 | 15.239 | 26.8771 | 24  | 24  | 0   | 0   | 223.91 | 14.977 | 0.0049 | 0.2563 |
| 50 | 22.917 | 41.5957 | 13  | 13  | 0   | 0   | 217.63 | 22.917 | 0      | 0      |
| 51 | 0.2453 | 0.2919  | 24  | 24  | 0   | 0   | 271.35 | 0.082  | 0.1346 | 0.0287 |
| 52 | 0.4325 | N/A     | N/A | N/A | N/A | N/A | 216.05 | 0.1685 | 0.2582 | 0.0058 |
| 53 | 75.708 | 81.3068 | 17  | 10  | 7   | 0   | 197    | 73.249 | 0.3104 | 2.1482 |
| 54 | 19.414 | 18.5813 | 71  | 71  | 0   | 0   | 168.84 | 14.384 | 1.4831 | 3.5474 |

Table S3. correlation of threshold with volumes and number of pockets.

| Correlation of threshold with:       | Pearson's correlation coefficient | P     | N  |
|--------------------------------------|-----------------------------------|-------|----|
| Fluid volume in the total colon      | 0.085                             | 0.573 | 46 |
| Fluid volume in the ascending colon  | 0.015                             | 0.924 | 46 |
| Fluid volume in the transverse colon | 0.253                             | 0.090 | 46 |
| Fluid volume in the descending colon | 0.030                             | 0.846 | 46 |
| Number of pockets                    | -0.169                            | 0.297 | 40 |

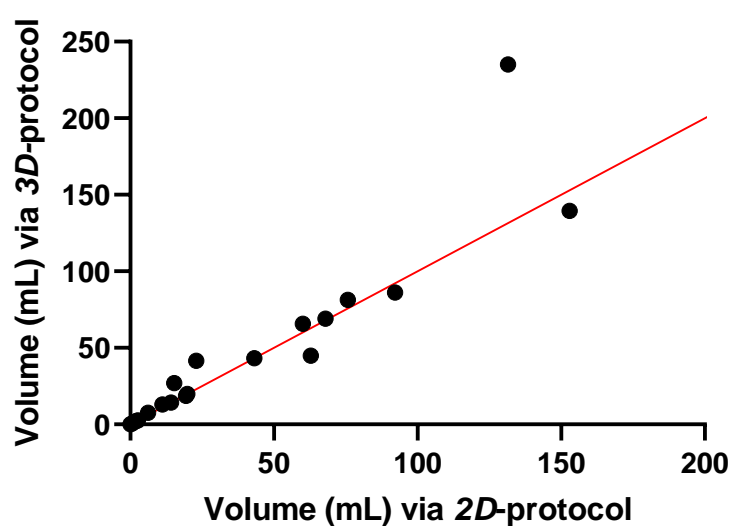Figure S1. correlation of the fluid volumes in the total colon on the same datasets between the 2D- and 3D-protocol (Pearson's correlation coefficient 0.939,  $p < 0.05$ ,  $n = 40$ ).

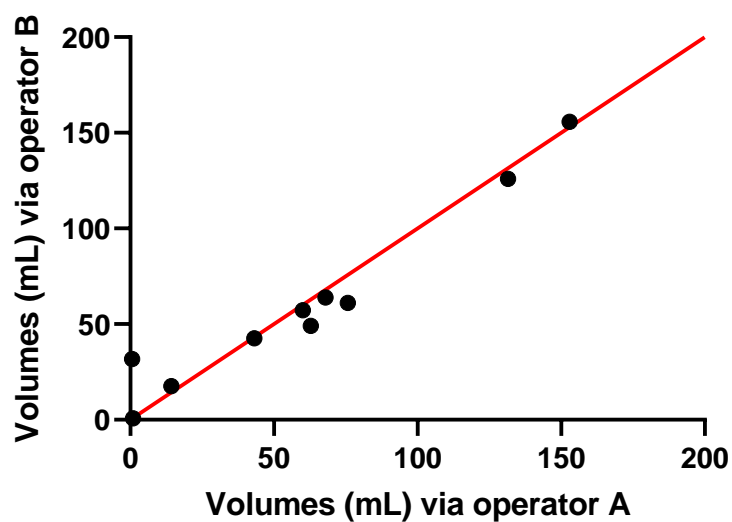

**Figure S2.** correlation of fluid volume in the total colon on the same datasets via the 2D-protocol between operators A and B (Pearson's correlation coefficient 0.970,  $p < 0.05$ ,  $n = 10$ ).

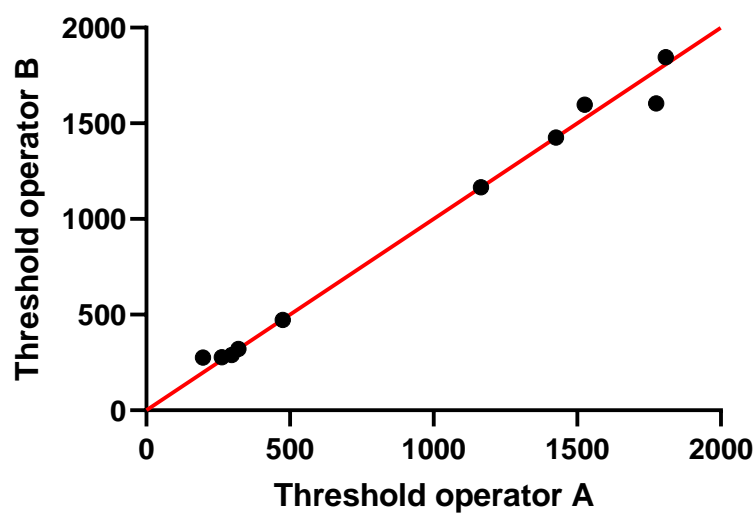

**Figure S3.** correlation between the CSF-threshold set on the same datasets between operators A and B (Pearson's correlation coefficient 0.995,  $p < 0.05$ ,  $n = 10$ ).
